# Supplementary material
Source: PubMed Central journal article supplement (PMC6002218)
Supplement: IMM-154-490-s001.pdf [file IMM-154-490-s001.pdf]

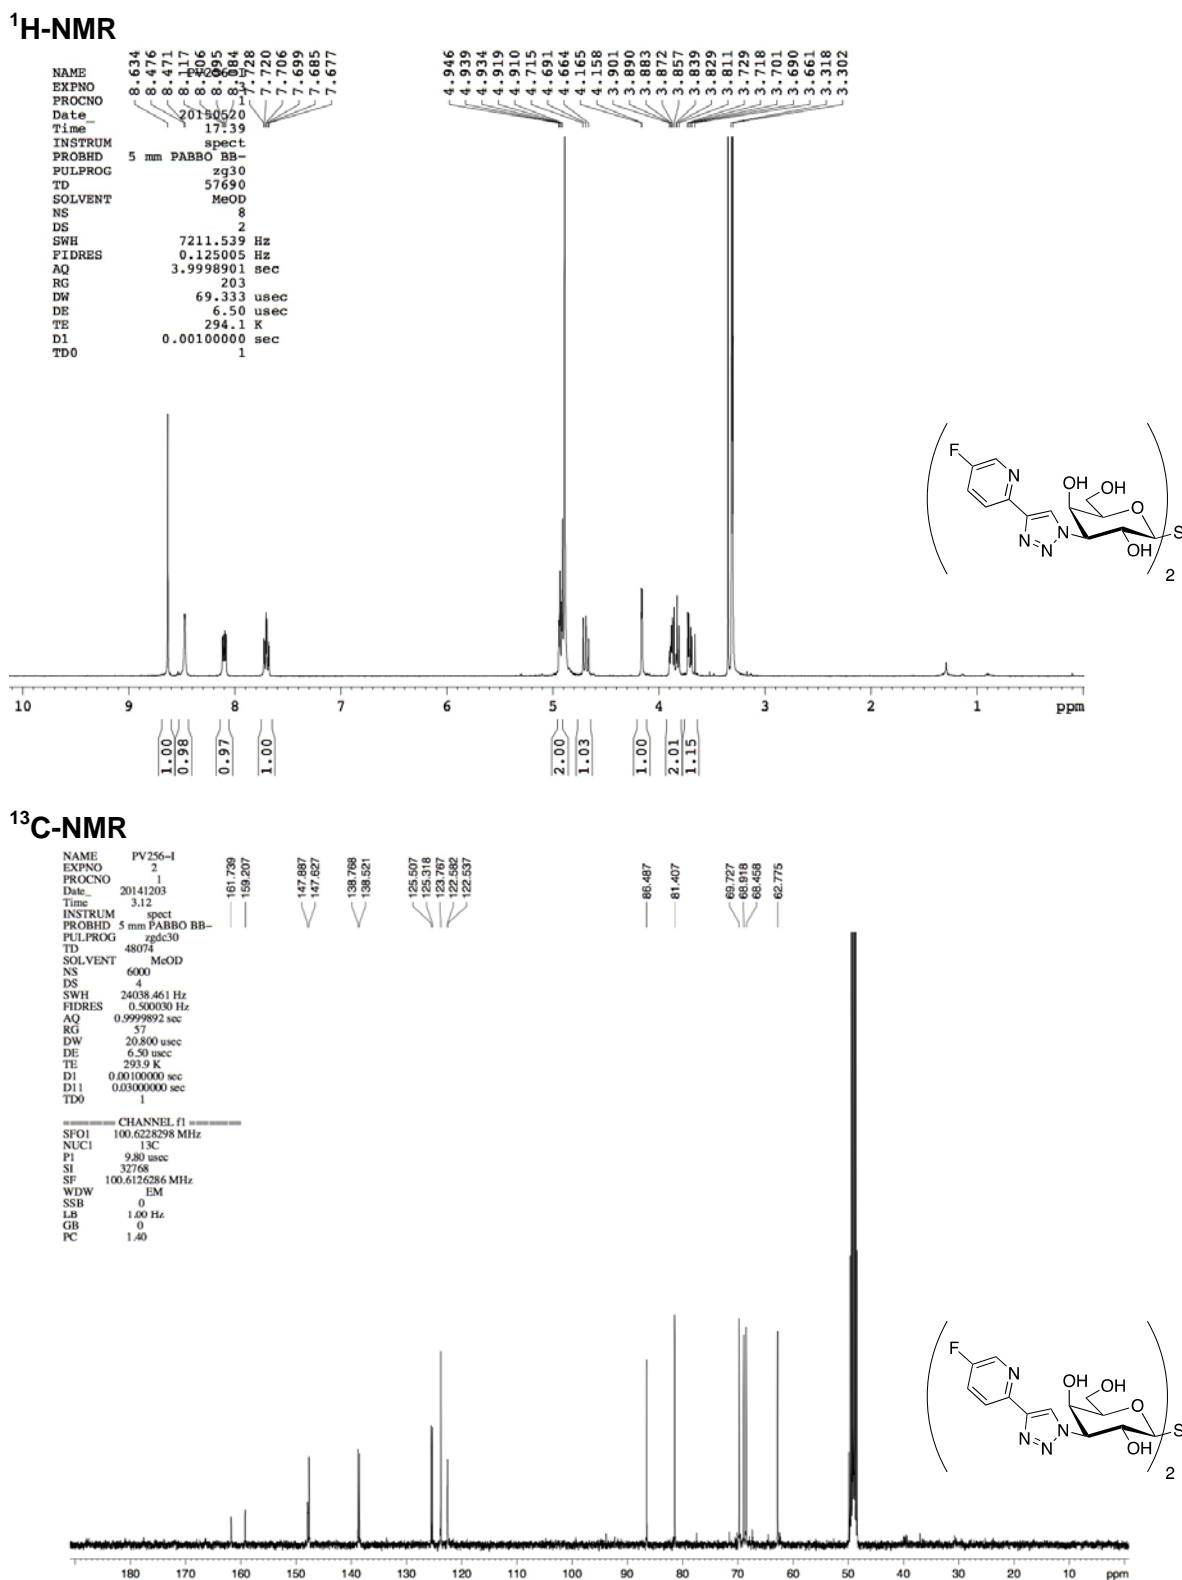

**FIGURE S1. <sup>1</sup>H-NMR and <sup>13</sup>C-NMR spectra of the galectin inhibitor.** Chemical shifts are reported in  $\delta$  parts per million (ppm).  $[\alpha]_D^{20}$  65.4 (c 0.35, CH<sub>3</sub>OH). <sup>1</sup>H NMR (CD<sub>3</sub>OD, 400 MHz)  $\delta$ : 8.63 (s, 2H, Ph), 8.47 (d,  $J$  = 2.4 Hz, 2H, Ph), 8.10 (dd,  $J$  = 8.8, 4.4 Hz, 2H, Ph), 7.70 (dt,  $J$  = 8.6, 2.9 Hz, 2H, Ph), 4.92 (m, 4H, H1 and H3), 4.70 (dd,  $J$  = 10.5, 9.8 Hz, 2H, H2), 4.16 (d,  $J$  = 2.9 Hz, 2H, H4), 3.90-3.81 (m, 4H, H5 and H6), 3.71 (dd,  $J$  = 11.2, 4.3 Hz, 2H, H6). <sup>13</sup>C NMR (CD<sub>3</sub>OD, 100 MHz)  $\delta$ : 161.7, 159.2, 147.9, 147.6, 138.6, 125.4, 123.8, 122.5, 86.5, 81.4, 69.7, 68.9, 68.5, 62.8. HRMS calculated for [C<sub>26</sub>H<sub>29</sub>F<sub>2</sub>N<sub>8</sub>O<sub>8</sub>S]<sup>+</sup>, 651.1797; found, 651.1800.
